# Supplementary material for: A multi-center randomized controlled trial of the LenoMed ATA-I-1-0 insulin pump for the intensive treatment of diabetic patients
Source: PubMed Central journal article supplement — Ann Transl Med. 2020 Nov;8(22):1485. doi: 10.21037/atm-20-6024 (PMC7729342; doi:10.21037/atm-20-6024), 2020-11
Supplement: atm-08-22-1485-dss.pdf [file atm-08-22-1485-dss.pdf]

## Data Sharing Statement

|                     |                                                                                                                                                     |                                                                                                                                                      |
|---------------------|-----------------------------------------------------------------------------------------------------------------------------------------------------|------------------------------------------------------------------------------------------------------------------------------------------------------|
| <b>Article Info</b> | <a href="http://dx.doi.org/10.21037/atm-20-6024">http://dx.doi.org/10.21037/atm-20-6024</a>                                                         |                                                                                                                                                      |
| <b>Item</b>         | <b>Question</b>                                                                                                                                     | <b>Authors' Response<br/>(place "-" if not applicable)</b>                                                                                           |
| 1                   | Would you like to share data collected for your study to others?                                                                                    | Yes.                                                                                                                                                 |
| 2                   | If not, would you like to share the reason for your decision?                                                                                       | -                                                                                                                                                    |
| 3                   | What data in particular will be shared?                                                                                                             | All the data in the article can be shared.                                                                                                           |
| 4                   | Any other documents will be shared? Such as study protocol, statistical analysis plan, informed consent form, clinical study report, analytic code. | Statistical analysis plan, informed consent form, and clinical study report will also be shared if requested.                                        |
| 5                   | When will data availability begin?                                                                                                                  | From the publication date.                                                                                                                           |
| 6                   | When will data availability end?                                                                                                                    | Two years within the publication date, since the technique or survival date may be updated over time.                                                |
| 7                   | To whom will you share the data?                                                                                                                    | Doctors who are interested in this studies                                                                                                           |
| 8                   | For what type of analysis or purpose?                                                                                                               | For analysis to evaluate the efficacy and safety of the LenoMed ATA-I-1-0 insulin pump for the treatment of patients with type 1 and type 2 diabetes |
| 9                   | How or where can the data/documents be obtained?                                                                                                    | Emails could be sent to the address below to obtain the shared data:<br>muyiming@301hospital.com.cn                                                  |
| 10                  | Any other restrictions?                                                                                                                             | We may balance the potential benefits and risks for each request and then provide the data that could be shared.                                     |
