# Supplementary material for: A multi-center randomized controlled trial of the LenoMed ATA-I-1-0 insulin pump for the intensive treatment of diabetic patients
Source: PubMed Central journal article supplement — Ann Transl Med. 2020 Nov;8(22):1485. doi: 10.21037/atm-20-6024 (PMC7729342; doi:10.21037/atm-20-6024), 2020-11
Supplement: atm-08-22-1485-supplementary.pdf [file atm-08-22-1485-supplementary.pdf]

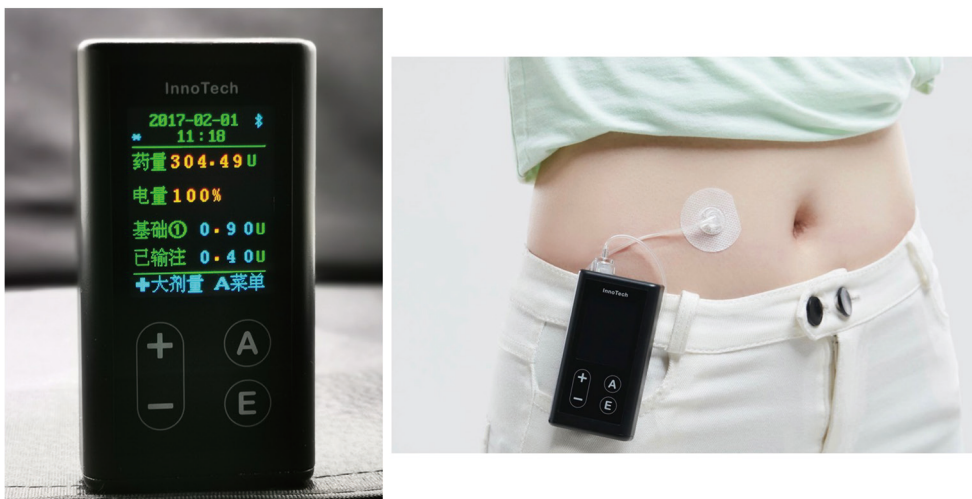

Figure S1 Representative images of the LenoMed ATA-I-1-0 insulin pump.

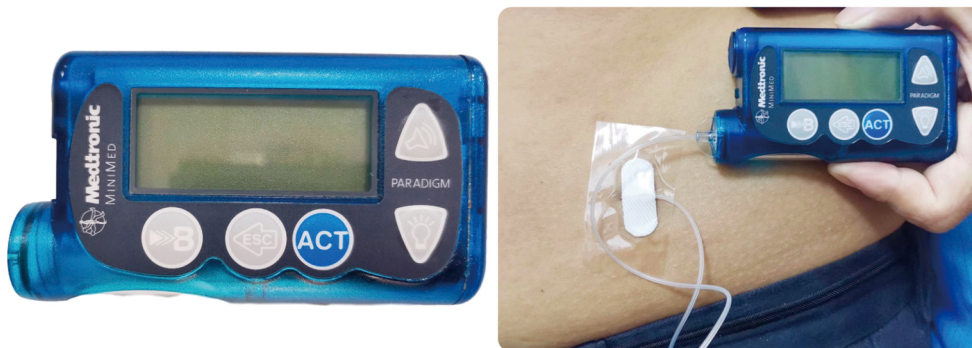

Figure S2 Representative images of the Medtronic MMT-712 insulin pump.

**Table S1** Recruited patients stratified by the 3 hospitals involved in the study

| Centers                                           | Group        | No. of recruited patients | No. of dropout patients | Dropout rate (%) | Exclusion | Exclusion rate (%) | Final recruited subjects |
|---------------------------------------------------|--------------|---------------------------|-------------------------|------------------|-----------|--------------------|--------------------------|
| Chinese People's Liberation Army General Hospital | Intervention | 30                        | 5                       | 16.67            | 4         | 13.33              | 25                       |
|                                                   | Control      | 30                        | 1                       | 3.33             | 4         | 13.33              | 29                       |
|                                                   | Total        | 60                        | 6                       | 10.00            | 8         | 13.33              | 54                       |
| Beijing Chaoyang Hospital                         | Intervention | 13                        | 0                       | 0.00             | 0         | 0.00               | 13                       |
|                                                   | Control      | 12                        | 0                       | 0.00             | 0         | 0.00               | 12                       |
|                                                   | Total        | 25                        | 0                       | 0.00             | 0         | 0.00               | 25                       |
| Beijing Pinggu District Hospital                  | Intervention | 17                        | 2                       | 11.76            | 0         | 0.00               | 15                       |
|                                                   | Control      | 18                        | 0                       | 0.00             | 0         | 0.00               | 18                       |
|                                                   | Total        | 35                        | 2                       | 5.71             | 0         | 0.00               | 33                       |
| Total                                             | Intervention | 60                        | 7                       | 11.67            | 4         | 6.67               | 53                       |
|                                                   | Control      | 60                        | 1                       | 1.67             | 4         | 6.67               | 59                       |
|                                                   | Total        | 120                       | 8                       | 6.67             | 8         | 6.67               | 112                      |

**Table S2** Recruited patients stratified by different datasets and hospitals

| Centers                                           | Per protocol set   |               |       | Full analysis set  |               |       | Safety analysis set |               |       |
|---------------------------------------------------|--------------------|---------------|-------|--------------------|---------------|-------|---------------------|---------------|-------|
|                                                   | Intervention group | Control group | Total | Intervention group | Control group | Total | Intervention group  | Control group | Total |
| Chinese People's Liberation Army General Hospital | 21                 | 25            | 46    | 25                 | 30            | 55    | 25                  | 30            | 55    |
| Beijing Chaoyang Hospital                         | 13                 | 12            | 25    | 13                 | 12            | 25    | 13                  | 12            | 25    |
| Beijing Pinggu District Hospital                  | 15                 | 18            | 33    | 16                 | 18            | 34    | 16                  | 18            | 34    |
| Total                                             | 49                 | 55            | 104   | 54                 | 60            | 114   | 54                  | 60            | 114   |

**Table S3** Detailed description of the enrolled patients and 3 datasets

| Variables                                    | Intervention group | Control group |
|----------------------------------------------|--------------------|---------------|
| Number of patients                           |                    |               |
| Recruited and randomized                     | 60                 | 60            |
| Completed the treatment                      | 53                 | 59            |
| Number of patients who stopped the treatment |                    |               |
| Not satisfied with the treatment             | 0                  | 1             |
| Had adverse events                           | 1                  | 0             |
| Frequent hypoglycemia                        | 0                  | 0             |
| Used prohibited medication                   | 0                  | 0             |
| Protocol violation that threatened safety    | 0                  | 0             |
| Patients withdrew informed consent           | 3                  | 0             |
| Death                                        | 0                  | 0             |
| Others                                       | 3                  | 0             |
| Dataset to analyze safety                    |                    |               |
| Safety analysis set                          | 54                 | 60            |
| Dataset to analyze efficacy                  |                    |               |
| Full analysis set                            | 54                 | 60            |
| Per protocol set                             | 49                 | 55            |

**Table S4** Difference in fasting plasma glucose levels before and after treatment

| Variable                                             | Indicators  | Full analysis set   |                     | Per protocol set    |                     |
|------------------------------------------------------|-------------|---------------------|---------------------|---------------------|---------------------|
|                                                      |             | Intervention group  | Control group       | Intervention group  | Control group       |
| Baseline                                             | N [missing] | 47 [7]              | 55 [5]              | 43 [6]              | 51 [4]              |
|                                                      | Mean (SD)   | 11.48 (2.53)        | 11.36 (3.23)        | 11.38 (2.59)        | 11.43 (3.32)        |
|                                                      | Median      | 10.70               | 10.80               | 10.60               | 10.80               |
|                                                      | Min–Max     | 6.80–16.70          | 5.90–18.10          | 6.80–16.70          | 5.90–18.10          |
| Comparison between groups                            | P value     | 0.833 <sup>a</sup>  |                     | 0.937 <sup>a</sup>  |                     |
| After treatment                                      | N [missing] | 54 [0]              | 59 [1]              | 49 [0]              | 55 [0]              |
|                                                      | Mean (SD)   | 6.61 (1.44)         | 6.74 (1.49)         | 6.59 (1.44)         | 6.68 (1.44)         |
|                                                      | Median      | 6.30                | 6.40                | 6.30                | 6.40                |
|                                                      | Min–Max     | 4.60–10.60          | 4.10–10.60          | 4.60–10.60          | 4.10–10.20          |
| Difference before and after the analysis             | N [missing] | 47 [7]              | 55 [5]              | 43 [6]              | 51 [4]              |
|                                                      | Mean (SD)   | –4.82 (2.36)        | –4.67 (3.65)        | –4.77 (2.41)        | –4.82 (3.64)        |
|                                                      | Median      | –4.50               | –4.60               | –4.50               | –4.60               |
|                                                      | Min–Max     | –10.70–0.50         | –13.30–2.40         | –10.70–0.50         | –13.30–1.40         |
| Comparison between groups                            | P value     | <0.001 <sup>a</sup> | <0.001 <sup>a</sup> | <0.001 <sup>a</sup> | <0.001 <sup>a</sup> |
| Comparison before and after treatment between groups | P value     | 0.803 <sup>a</sup>  |                     | 0.945 <sup>a</sup>  |                     |

<sup>a</sup>, the comparison was conducted using the Cochran-Mantel-Haenszel test.

**Table S5** Difference in plasma glucose levels 2 hours after breakfast before and after treatment

| Variable                                             | Indicators  | Full analysis set   |                     | Per protocol set    |                     |
|------------------------------------------------------|-------------|---------------------|---------------------|---------------------|---------------------|
|                                                      |             | Intervention group  | Control group       | Intervention group  | Control group       |
| Baseline                                             | N [missing] | 35 [19]             | 37 [23]             | 31 [18]             | 33 [22]             |
|                                                      | Mean (SD)   | 18.36 (5.18)        | 16.23 (5.21)        | 18.30 (5.21)        | 15.88 (4.88)        |
|                                                      | Median      | 16.80               | 16.10               | 16.80               | 15.40               |
|                                                      | Min–Max     | 10.00–29.70         | 7.70–30.50          | 10.00–29.70         | 7.70–30.50          |
| Comparison between groups                            | P value     | 0.087 <sup>a</sup>  |                     | 0.060 <sup>a</sup>  |                     |
| After treatment                                      | N [missing] | 44 [10]             | 51 [9]              | 40 [9]              | 48 [7]              |
|                                                      | Mean (SD)   | 10.12 (3.33)        | 10.17 (3.20)        | 10.18 (3.42)        | 10.02 (3.07)        |
|                                                      | Median      | 9.45                | 9.70                | 9.45                | 9.65                |
|                                                      | Min–Max     | 4.70–21.60          | 4.70–19.20          | 4.70–21.60          | 4.70–19.20          |
| Difference before and after analysis                 | N [missing] | 27 [27]             | 33 [27]             | 24 [25]             | 30 [25]             |
|                                                      | Mean (SD)   | –8.04 (5.10)        | –6.60 (4.76)        | –7.76 (5.26)        | –6.28 (4.26)        |
|                                                      | Median      | –7.80               | –6.30               | –7.50               | –5.95               |
|                                                      | Min–Max     | –16.30–3.30         | –16.80–3.50         | –16.30–3.30         | –16.00–3.50         |
| Comparison between groups                            | P value     | <0.001 <sup>a</sup> | <0.001 <sup>a</sup> | <0.001 <sup>a</sup> | <0.001 <sup>a</sup> |
| Comparison before and after treatment between groups | P value     | 0.263 <sup>a</sup>  |                     | 0.259 <sup>a</sup>  |                     |

<sup>a</sup>, the comparison was conducted using the Cochran-Mantel-Haenszel test.

**Table S6** Difference in plasma glucose levels 2 hours before lunch before and after treatment

| Variable                                             | Indicators  | Full analysis set   |                     | Per protocol set    |                     |
|------------------------------------------------------|-------------|---------------------|---------------------|---------------------|---------------------|
|                                                      |             | Intervention group  | Control group       | Intervention group  | Control group       |
| Baseline                                             | N [missing] | 40 [14]             | 46 [14]             | 36 [13]             | 43 [12]             |
|                                                      | Mean (SD)   | 14.62 (4.31)        | 14.11 (5.33)        | 14.71 (4.52)        | 14.34 (5.36)        |
|                                                      | Median      | 13.50               | 13.60               | 13.50               | 13.90               |
|                                                      | Min–Max     | 8.90–26.80          | 6.20–31.60          | 8.90–26.80          | 6.20–31.60          |
| Comparison between groups                            | P value     | 0.565 <sup>a</sup>  |                     | 0.727 <sup>a</sup>  |                     |
| After treatment                                      | N [missing] | 50 [4]              | 59 [1]              | 46 [3]              | 55 [0]              |
|                                                      | Mean (SD)   | 8.36 (3.19)         | 8.09 (3.03)         | 8.50 (3.23)         | 7.96 (2.93)         |
|                                                      | Median      | 7.35                | 7.50                | 7.50                | 7.50                |
|                                                      | Min–Max     | 4.40–17.10          | 3.70–16.60          | 4.40–17.10          | 3.70–16.60          |
| Difference before and after analysis                 | N [missing] | 38 [16]             | 46 [14]             | 35 [14]             | 43 [12]             |
|                                                      | Mean (SD)   | –6.19 (4.14)        | –6.00 (4.99)        | –6.14 (4.17)        | –6.33 (4.82)        |
|                                                      | Median      | –6.35               | –6.20               | –6.10               | –6.30               |
|                                                      | Min–Max     | –19.90–1.90         | –16.90–4.70         | –19.90–1.90         | –16.90–2.90         |
| Comparison between groups                            | P value     | <0.001 <sup>a</sup> | <0.001 <sup>a</sup> | <0.001 <sup>a</sup> | <0.001 <sup>a</sup> |
| Comparison before and after treatment between groups | P value     | 0.856 <sup>a</sup>  |                     | 0.856 <sup>a</sup>  |                     |

<sup>a</sup>, the comparison was conducted using the Cochran-Mantel-Haenszel test.

**Table S7** Difference in plasma glucose levels 2 hours after lunch before and after treatment

| Variable                                             | Indicators  | Full analysis set   |                     | Per protocol set    |                     |
|------------------------------------------------------|-------------|---------------------|---------------------|---------------------|---------------------|
|                                                      |             | Intervention group  | Control group       | Intervention group  | Control group       |
| Baseline                                             | N [missing] | 43 [11]             | 50 [10]             | 39 [10]             | 46 [9]              |
|                                                      | Mean (SD)   | 17.04 (4.01)        | 16.01 (5.85)        | 16.86 (4.06)        | 16.20 (5.92)        |
|                                                      | Median      | 16.70               | 16.45               | 16.50               | 16.90               |
|                                                      | Min–Max     | 9.30–25.80          | 4.80–28.20          | 9.30–25.80          | 4.80–28.20          |
| Comparison between groups                            | P value     | 0.319 <sup>a</sup>  |                     | 0.545 <sup>a</sup>  |                     |
| After treatment                                      | N [missing] | 51 [3]              | 57 [3]              | 46 [3]              | 53 [2]              |
|                                                      | Mean (SD)   | 10.36 (3.12)        | 10.08 (3.49)        | 10.41 (3.18)        | 9.92 (3.54)         |
|                                                      | Median      | 10.10               | 9.90                | 10.15               | 9.20                |
|                                                      | Min–Max     | 4.20–18.50          | 4.30–22.20          | 4.20–18.50          | 4.30–22.20          |
| Difference before and after analysis                 | N [missing] | 41 [13]             | 49 [11]             | 37 [12]             | 45 [10]             |
|                                                      | Mean (SD)   | –6.39 (4.68)        | –5.66 (6.23)        | –6.16 (4.78)        | –6.02 (6.32)        |
|                                                      | Median      | –5.60               | –4.80               | –5.30               | –4.90               |
|                                                      | Min–Max     | –16.90–3.60         | –21.50–5.70         | –16.90–3.60         | –21.50–5.70         |
| Comparison between groups                            | P value     | <0.001 <sup>a</sup> | <0.001 <sup>a</sup> | <0.001 <sup>a</sup> | <0.001 <sup>a</sup> |
| Comparison before and after treatment between groups | P value     | 0.538 <sup>a</sup>  |                     | 0.914 <sup>a</sup>  |                     |

<sup>a</sup>, the comparison was conducted using the Cochran-Mantel-Haenszel test.

**Table S8** Difference in plasma glucose levels 2 hours before dinner before and after treatment

| Variable                                             | Indicators  | Full analysis set   |                     | Per protocol set    |                     |
|------------------------------------------------------|-------------|---------------------|---------------------|---------------------|---------------------|
|                                                      |             | Intervention group  | Control group       | Intervention group  | Control group       |
| Baseline                                             | N [missing] | 41 [13]             | 47 [13]             | 36 [13]             | 43 [12]             |
|                                                      | Mean (SD)   | 14.02 (5.33)        | 13.68 (5.67)        | 14.16 (5.57)        | 13.87 (5.80)        |
|                                                      | Median      | 14.30               | 12.40               | 14.35               | 12.40               |
|                                                      | Min–Max     | 5.90–33.30          | 5.70–33.30          | 5.90–33.30          | 5.70–33.30          |
| Comparison between groups                            | P value     | 0.682 <sup>a</sup>  |                     | 0.802 <sup>a</sup>  |                     |
| After treatment                                      | N [missing] | 52 [2]              | 55 [5]              | 48 [1]              | 51 [4]              |
|                                                      | Mean (SD)   | 8.11 (2.51)         | 8.14 (3.04)         | 8.11 (2.48)         | 8.06 (3.08)         |
|                                                      | Median      | 7.30                | 7.50                | 7.30                | 7.30                |
|                                                      | Min–Max     | 4.10–14.40          | 3.90–20.80          | 4.10–14.40          | 3.90–20.80          |
| Difference before and after analysis                 | N [missing] | 40 [14]             | 43 [17]             | 36 [13]             | 39 [16]             |
|                                                      | Mean (SD)   | –6.07 (4.69)        | –5.18 (4.87)        | –6.20 (4.84)        | –5.47 (4.91)        |
|                                                      | Median      | –5.75               | –3.80               | –6.05               | –3.80               |
|                                                      | Min–Max     | –18.90–3.40         | –19.00–3.10         | –18.90–3.40         | –19.00–3.10         |
| Comparison between groups                            | P value     | <0.001 <sup>a</sup> | <0.001 <sup>a</sup> | <0.001 <sup>a</sup> | <0.001 <sup>a</sup> |
| Comparison before and after treatment between groups | P value     | 0.403 <sup>a</sup>  |                     | 0.519 <sup>a</sup>  |                     |

<sup>a</sup>, the comparison was conducted using the Cochran-Mantel-Haenszel test.

**Table S9** Differences in plasma glucose levels at 2 hours after dinner before and after treatment

| Variable                                             | Indicators  | Full analysis set   |                     | Per protocol set    |                     |
|------------------------------------------------------|-------------|---------------------|---------------------|---------------------|---------------------|
|                                                      |             | Intervention group  | Control group       | Intervention group  | Control group       |
| Baseline                                             | N [missing] | 47 [7]              | 47 [13]             | 43 [6]              | 43 [12]             |
|                                                      | Mean (SD)   | 16.61 (4.77)        | 15.44 (5.59)        | 16.58 (4.93)        | 16.07 (5.32)        |
|                                                      | Median      | 16.30               | 14.50               | 16.00               | 14.90               |
|                                                      | Min–Max     | 9.90–32.80          | 3.60–33.10          | 9.90–32.80          | 6.80–33.10          |
| Comparison between groups                            | P value     | 0.150 <sup>a</sup>  |                     | 0.419 <sup>a</sup>  |                     |
| After treatment                                      | N [missing] | 51 [3]              | 57 [3]              | 47 [2]              | 53 [2]              |
|                                                      | Mean (SD)   | 8.74 (3.00)         | 9.15 (2.72)         | 8.87 (3.05)         | 9.17 (2.79)         |
|                                                      | Median      | 8.50                | 8.10                | 8.50                | 8.10                |
|                                                      | Min–Max     | 4.70–16.30          | 4.10–15.60          | 4.70–16.30          | 4.10–15.60          |
| Difference before and after analysis                 | N [missing] | 44 [10]             | 45 [15]             | 41 [8]              | 42 [13]             |
|                                                      | Mean (SD)   | –7.97 (5.36)        | –6.64 (5.58)        | –7.85 (5.37)        | –7.00 (5.49)        |
|                                                      | Median      | –7.30               | –6.10               | –7.10               | –6.40               |
|                                                      | Min–Max     | –22.40–2.20         | –25.50–4.20         | –22.40–2.20         | –25.50–2.50         |
| Comparison between groups                            | P value     | <0.001 <sup>a</sup> | <0.001 <sup>a</sup> | <0.001 <sup>a</sup> | <0.001 <sup>a</sup> |
| Comparison before and after treatment between groups | P value     | 0.135 <sup>a</sup>  |                     | 0.287 <sup>a</sup>  |                     |

<sup>a</sup>The comparison was conducted using the Cochran-Mantel-Haenszel test.

**Table S10** Difference in plasma glucose levels before sleep (10 pm) before and after treatment

| Variable                                             | Indicators  | Full analysis set   |                     | Per protocol set    |                     |
|------------------------------------------------------|-------------|---------------------|---------------------|---------------------|---------------------|
|                                                      |             | Intervention group  | Control group       | Intervention group  | Control group       |
| Baseline                                             | N [missing] | 51 [3]              | 51 [9]              | 46 [3]              | 47 [8]              |
|                                                      | Mean (SD)   | 15.08 (4.78)        | 13.30 (5.21)        | 15.02 (4.90)        | 13.80 (5.06)        |
|                                                      | Median      | 14.20               | 13.00               | 14.10               | 13.10               |
|                                                      | Min–Max     | 5.60–27.50          | 4.30–32.10          | 5.60–27.50          | 5.70–32.10          |
| Comparison between groups                            | P value     | 0.051 <sup>a</sup>  |                     | 0.201 <sup>a</sup>  |                     |
| After treatment                                      | N [missing] | 54 [0]              | 58 [2]              | 49 [0]              | 54 [1]              |
|                                                      | Mean (SD)   | 7.56 (2.10)         | 8.01 (2.52)         | 7.66 (2.07)         | 8.10 (2.53)         |
|                                                      | Median      | 7.25                | 7.15                | 7.30                | 7.30                |
|                                                      | Min–Max     | 3.80–13.40          | 4.10–13.70          | 4.10–13.40          | 4.10–13.70          |
| Difference before and after analysis                 | N [missing] | 51 [3]              | 49 [11]             | 46 [3]              | 46 [9]              |
|                                                      | Mean (SD)   | –7.51 (4.86)        | –5.42 (5.77)        | –7.35 (4.83)        | –5.69 (5.80)        |
|                                                      | Median      | –6.80               | –5.50               | –6.65               | –6.00               |
|                                                      | Min–Max     | –19.40–2.40         | –26.20–3.50         | –19.40–2.40         | –26.20–3.50         |
| Comparison between groups                            | P value     | <0.001 <sup>a</sup> | <0.001 <sup>a</sup> | <0.001 <sup>a</sup> | <0.001 <sup>a</sup> |
| Comparison before and after treatment between groups | P value     | 0.024 <sup>a</sup>  |                     | 0.080 <sup>a</sup>  |                     |

<sup>a</sup>, the comparison was conducted using the Cochran-Mantel-Haenszel test.

**Table S11** Difference in hemoglobin A1c (HbA1c) levels before and after treatment between the control and intervention group

| Variable                                             | Indicators  | Full analysis set   |                     | Per protocol set    |                     |
|------------------------------------------------------|-------------|---------------------|---------------------|---------------------|---------------------|
|                                                      |             | Intervention group  | Control group       | Intervention group  | Control group       |
| Baseline                                             | N [missing] | 54 [0]              | 60 [0]              | 49 [0]              | 55 [0]              |
|                                                      | Mean (SD)   | 10.71 (1.43)        | 10.86 (1.66)        | 10.68 (1.49)        | 10.92 (1.71)        |
|                                                      | Median      | 10.35               | 10.50               | 10.30               | 10.50               |
|                                                      | Q1–Q3       | 9.60–11.60          | 9.70–11.25          | 9.50–11.80          | 9.80–11.30          |
|                                                      | Min–Max     | 9.00–14.40          | 9.10–16.20          | 9.00–14.40          | 9.10–16.20          |
| Comparison between groups                            | P value     | 0.685 <sup>a</sup>  |                     | 0.346 <sup>a</sup>  |                     |
| After treatment                                      | N [missing] | 53 [1]              | 59 [1]              | 48 [1]              | 55 [0]              |
|                                                      | Mean (SD)   | 10.18 (1.30)        | 10.35 (1.50)        | 10.15 (1.35)        | 10.39 (1.55)        |
|                                                      | Median      | 9.80                | 9.90                | 9.60                | 9.90                |
|                                                      | Q1–Q3       | 9.10–11.10          | 9.40–10.70          | 9.10–11.15          | 9.40–10.90          |
|                                                      | Min–Max     | 8.50–13.50          | 8.30–15.80          | 8.50–13.50          | 8.30–15.80          |
| Comparison between groups                            | P value     | 0.514               |                     | 0.337               |                     |
| Difference before and after analysis                 | N [missing] | 53 [1]              | 59 [1]              | 48 [1]              | 55 [0]              |
|                                                      | Mean (SD)   | –0.47 (0.30)        | –0.54 (0.39)        | –0.46 (0.30)        | –0.53 (0.40)        |
|                                                      | Median      | –0.40               | –0.50               | –0.40               | –0.50               |
|                                                      | Q1–Q3       | –0.70–0.30          | –0.70–0.30          | –0.70–0.25          | –0.70–0.30          |
|                                                      | Min–Max     | –1.20–0.10          | –1.90–0.30          | –1.20–0.10          | –1.90–0.30          |
| Comparison between groups                            | P value     | <0.001 <sup>a</sup> | <0.001 <sup>a</sup> | <0.001 <sup>a</sup> | <0.001 <sup>a</sup> |
| Comparison before and after treatment between groups | P value     | 0.411 <sup>a</sup>  |                     | 0.353 <sup>a</sup>  |                     |
|                                                      | 95% CI      | –0.06–0.20          |                     | –0.06–0.22          |                     |

<sup>a</sup>, the comparison was conducted using the Wilcoxon rank sum test.

**Table S12** Daily accuracy of the LenoMed ATA-I-1-0 insulin pump during treatment

| Variable                                         | Indicators      | Full analysis set  |               | Per protocol set   |               |
|--------------------------------------------------|-----------------|--------------------|---------------|--------------------|---------------|
|                                                  |                 | Intervention group | Control group | Intervention group | Control group |
| Total base rate on 1 <sup>st</sup> treatment day | No, n (%)       | 0 (0.00)           | 0 (0.00)      | 0 (0.00)           | 0 (0.00)      |
|                                                  | Yes, n (%)      | 54 (100.00)        | 60 (100.00)   | 49 (100.00)        | 55 (100.00)   |
|                                                  | Total [missing] | 54 [0]             | 60 [0]        | 49 [0]             | 55 [0]        |
| Large dose on 1 <sup>st</sup> treatment day      | No, n (%)       | 0 (0.00)           | 0 (0.00)      | 0 (0.00)           | 0 (0.00)      |
|                                                  | Yes, n (%)      | 52 (100.00)        | 57 (100.00)   | 47 (100.00)        | 53 (100.00)   |
|                                                  | Total [missing] | 52 [2]             | 57 [3]        | 47 [2]             | 53 [2]        |
| Total base rate on 2 <sup>nd</sup> treatment day | No, n (%)       | 0 (0.00)           | 0 (0.00)      | 0 (0.00)           | 0 (0.00)      |
|                                                  | Yes, n (%)      | 54 (100.00)        | 60 (100.00)   | 49 (100.00)        | 55 (100.00)   |
|                                                  | Total [missing] | 54 [0]             | 60 [0]        | 49 [0]             | 55 [0]        |
| Large dose on 2 <sup>nd</sup> treatment day      | No, n (%)       | 0 (0.00)           | 0 (0.00)      | 0 (0.00)           | 0 (0.00)      |
|                                                  | Yes, n (%)      | 54 (100.00)        | 60 (100.00)   | 49 (100.00)        | 55 (100.00)   |
|                                                  | Total [missing] | 54 [0]             | 60 [0]        | 49 [0]             | 55 [0]        |
| Total base rate on 3 <sup>rd</sup> treatment day | No, n (%)       | 0 (0.00)           | 0 (0.00)      | 0 (0.00)           | 0 (0.00)      |
|                                                  | Yes, n (%)      | 54 (100.00)        | 59 (100.00)   | 49 (100.00)        | 55 (100.00)   |
|                                                  | Total [missing] | 54 [0]             | 59 [1]        | 49 [0]             | 55 [0]        |
| Large dose on 3 <sup>rd</sup> treatment day      | No, n (%)       | 0 (0.00)           | 0 (0.00)      | 0 (0.00)           | 0 (0.00)      |
|                                                  | Yes, n (%)      | 54 (100.00)        | 59 (100.00)   | 49 (100.00)        | 55 (100.00)   |
|                                                  | Total [missing] | 54 [0]             | 59 [1]        | 49 [0]             | 55 [0]        |
| Total base rate on 4 <sup>th</sup> treatment day | No, n (%)       | 0 (0.00)           | 0 (0.00)      | 0 (0.00)           | 0 (0.00)      |
|                                                  | Yes, n (%)      | 54 (100.00)        | 59 (100.00)   | 49 (100.00)        | 55 (100.00)   |
|                                                  | Total [missing] | 54 [0]             | 59 [1]        | 49 [0]             | 55 [0]        |
| Large dose on 4 <sup>th</sup> treatment day      | No, n (%)       | 0 (0.00)           | 0 (0.00)      | 0 (0.00)           | 0 (0.00)      |
|                                                  | Yes, n (%)      | 54 (100.00)        | 59 (100.00)   | 49 (100.00)        | 55 (100.00)   |
|                                                  | Total [missing] | 54 [0]             | 59 [1]        | 49 [0]             | 55 [0]        |
| Total base rate on 5 <sup>th</sup> treatment day | No, n (%)       | 0 (0.00)           | 0 (0.00)      | 0 (0.00)           | 0 (0.00)      |
|                                                  | Yes, n (%)      | 54 (100.00)        | 59 (100.00)   | 49 (100.00)        | 55 (100.00)   |
|                                                  | Total [missing] | 54 [0]             | 59 [1]        | 49 [0]             | 55 [0]        |
| Large dose on 5 <sup>th</sup> treatment day      | No, n (%)       | 0 (0.00)           | 0 (0.00)      | 0 (0.00)           | 0 (0.00)      |
|                                                  | Yes, n (%)      | 54 (100.00)        | 59 (100.00)   | 49 (100.00)        | 55 (100.00)   |
|                                                  | Total [missing] | 54 [0]             | 59 [1]        | 49 [0]             | 55 [0]        |
| Total base rate on 6 <sup>th</sup> treatment day | No, n (%)       | 0 (0.00)           | 0 (0.00)      | 0 (0.00)           | 0 (0.00)      |
|                                                  | Yes, n (%)      | 54 (100.00)        | 59 (100.00)   | 49 (100.00)        | 55 (100.00)   |
|                                                  | Total [missing] | 54 [0]             | 59 [1]        | 49 [0]             | 55 [0]        |
| Large dose on 6 <sup>th</sup> treatment day      | No, n (%)       | 0 (0.00)           | 0 (0.00)      | 0 (0.00)           | 0 (0.00)      |
|                                                  | Yes, n (%)      | 53 (100.00)        | 59 (100.00)   | 48 (100.00)        | 55 (100.00)   |
|                                                  | Total [missing] | 53 [1]             | 59 [1]        | 48 [1]             | 55 [0]        |
